# Supplementary material for: Synthesis and characterisation of the first carbene–thallium complexes: molecular structure of [TlCl3{CN(Mes)C2H2N(Mes)}], Mes = C6H2Me3-2,4,6†
Source: Royal Society of Chemistry journal article supplement (doi:10.1039/b105322c), 2001-01-01
Supplement: b105322c.doc [file b105322c.doc]

**Synthesis and Characterisation of the First Carbene-Thallium Complexes: Molecular Structure of [TlCl3{CN(Mes)C2H2N(Mes)}], Mes = C6H2Me3-2,4,6**

**Marcus L. Cole, Aaron J. Davies and Cameron Jones***

**Supplementary synthetic and spectroscopic data for compounds 2 and 3**

**[TlBr3{CN(Mes)C2H2N(Mes)}].THF 2:** Bromine was added dropwise to a THF (100 cm3) suspension of anhydrous TlBr (0.75 g, 2.64 mmol) until complete dissolution had occurred to yield solvated TlBr3. Volatiles were removed *in vacuo* to remove traces of excess bromine and the subsequent light cream solid was dissolved in fresh THF (60 cm3). After cooling to –30oC, a THF solution (*ca.* 40 cm3) of :CN(Mes)C2H2N(Mes) (0.80 g, 2.63 mmol) was added dropwise over a period of 30 minutes. The resultant light amber solution was then stirred overnight and warmed to room temperature. This yielded a dark orange suspension. Volatiles were removed *in vacuo* and the residue was recrystallised from the minimum volume of THF to yield the product as fine needles after placement at –30 oC. Yield 1.26 g, 64 %; mp 182 oC (dec). 1H NMR (400 MHz, CD2Cl2, 300K): ** 1.58 (m, 4H, thf), 2.19 (s, 12H, *o*-CH3), 2.38 (s, 6H, *p*-CH3), 3.39 (m, 4H, thf), 7.11 (s, 4H, *m*-H), 7.42 (d, 2H, 4*J*TlH 91 Hz, C2H2). 13C NMR (100.6 MHz, CD2Cl2, 300K): ** 20.3 (s, *o*-CH3), 24.2 (s, *p-*CH3), 27.1 (s, THF CH2), 68.2 (s, THF OCH2), 125.3 (d, 3*J*TlC,216 Hz, C2H2), 131.0 (s, *m*-C), 136.1 (s, *o*-C), 136.2 (s, *p*-C), 144.5 (s, *ipso*-C); MS APCI: *m/z* (%) 305 [{M-TlBr3}H+, 100], 251 [{M-TlBr2}+, 21], 669 [{M-Br}+, 18]. IR (Nujol) /cm-1: 835w, 902m, 1061s br, 1091s sh, 1151m, 1388m sh, 1468m, 1622m sh, 1705w.

**[TlCl3{CN(Mes)C2Br2N(Mes)}]**.**THF 3.** A deep red THF solution (*ca.* 10 cm3) of CN(Mes)C2Br2N(Mes) (0.32 g, 0.69 mmol) was added dropwise to a cooled (-30 oC) clear solution of TlCl3 (0.22 g, 0.71 mmol) in THF (*ca.* 20 cm3) over 15 minutes. The resultant clear light red solution was then stirred overnight and warmed to room temperature. This yielded an off white suspension. Volatiles were removed *in vacuo* and the resultant solid was recrystallised from the minimum volume of fresh THF to yield the product as plates after placement at –30 oC. Yield 0.41 g, 77 %; mp 178oC (dec). 1H NMR (400 MHz, CD2Cl2, 300K): ** 1.77 (m, 4H, thf), 2.12 (s, 12H, *o*-CH3), 2.35 (s, 6H, *p*-CH3), 3.67 (m, 4H, thf), 7.14 (s, 4H, *m*-H). 13C NMR (100.6 MHz, CD2Cl2, 300K): ** 18.6 (s, *o*-CH3), 21.9 (s, *p-*CH3), 26.4 (s, thf), 68.5 (s, thf), 116.2 (d, 3*J*TlC 230 Hz, C2Br2), 131.0 (s, *m*-C), 135.2 (s, *o*-C), 135.3 (s, *p*-C), 143.5 (s, *ipso*-C). MS APCI: *m/z* (%) 374 ({M-TlClBr2}H+, 36), 409 ({M-TlBr2}+, 100), 453 ({M-TlClBr}+, 14), 498 ({M-TlCl2}+, 58), 693 ({M-Br}+, 11), 737 ({M-Cl}+, 15). IR (Nujol) /cm-1: 872m, 1041s, 1091s br, 1324s, 1609w,­〒ἀ械‮뒰⅁誰∅誰⌅­­〒ἀ械‮뒰⅁誰∅誰⌅ꂐ␅ꂐ┅°222222222222222222222­­〒ἀ械‮­­〒ἀ械‮뒰⅁誰∅誰⌅ꂐ␅ꂐ┅°2222222222222222222222222222222222222222222222222222222222222222222222222222222222222222222222222222222222222222222222222222222222222222222222222222222222222222222222222222222222222222222222222222222222222222222­
